# Supplementary material
Source: PubMed Central journal article supplement (PMC5933370)
Supplement: EHP1521.s001.acco.pdf [file EHP1521.s001.acco.pdf]

**Note to readers with disabilities:** *EHP* strives to ensure that all journal content is accessible to all readers. However, some figures and Supplemental Material published in *EHP* articles may not conform to [508 standards](#) due to the complexity of the information being presented. If you need assistance accessing journal content, please contact [ehp508@niehs.nih.gov](mailto:ehp508@niehs.nih.gov). Our staff will work with you to assess and meet your accessibility needs within 3 working days.

### **Supplemental Material**

#### **Plasma Metal Concentrations and Incident Coronary Heart Disease in Chinese Adults: The Dongfeng-Tongji Cohort**

Yu Yuan, Yang Xiao, Wei Feng, Yiyi Liu, Yanqiu Yu, Lue Zhou, Gaokun Qiu, Hao Wang, Bing Liu, Kang Liu, Handong Yang, Xiulou Li, Xinwen Min, Ce Zhang, Chengwei Xu, Xiaomin Zhang, Meian He, Frank B. Hu, An Pan, and Tangchun Wu

#### **Table of Contents**

**Table S1.** Limits of detection, percentages of samples below detection limits, intra-assay and inter-assay coefficients of variation (n = 3242).

**Table S2.** Correlations between plasma metals among the case-control participants (n = 3242).

**Table S3.** Basic characteristics of the study participants in the Metals Correlation Study at baseline (n = 94).

**Table S4.** Metal concentrations and correlations between plasma, whole blood and urine samples in the Metals Correlation Study (n = 94).

**Table S5.** Adjusted odds ratios (95% CI) for incident CHD according to quartiles of exposure for plasma metals included in the single-metal model.

**Table S6.** Adjusted odds ratios (95% CI) for incident CHD according to quartiles of exposure for plasma metals included in the multiple-metal model.

**Table S7.** Adjusted odds ratios (95% CI) for incident CHD in subgroups stratified by age, sex, body mass index, smoking status, hypertension, diabetes, and renal function.

**Table S8.** Comparison of baseline basic characteristics of the study participants in the case-control study (n = 1621) and Metals Variability Study (n = 138).

**Table S9.** Variance and correlations between plasma metal concentrations measured in samples collected in 2003 and 2008 from participants in the Metals Variability Study (n = 138).

**Table S10.** Basic characteristics of case-control study participants according to quartiles of plasma titanium (n = 3242).

**Figure S1.** Correlation matrix of plasma metals among the case-control study participants. Spearman's rank correlation coefficients are presented.

**Figure S2.** The restricted cubic spline for the association between plasma metals and incident CHD.

**Table S1. Limits of detection, percentages of samples below detection limits, intra-assay and inter-assay coefficients of variation (n = 3242).**

| Plasma metals (µg/L) | LOD    | Total No. (%) < LOD <sup>a</sup> | Cases < LOD <sup>a</sup> | Controls < LOD <sup>a</sup> | Intra-assay CV% | Inter-assay CV% |
|----------------------|--------|----------------------------------|--------------------------|-----------------------------|-----------------|-----------------|
| Aluminum             | 0.2534 | 6 (0.19)                         | 2 (0.12)                 | 4 (0.25)                    | 3.65            | 5.74            |
| Antimony             | 0.0030 | 378 (11.66)                      | 196 (12.09)              | 182 (11.23)                 | 2.44            | 6.67            |
| Arsenic              | 0.0141 | 6 (0.19)                         | 1 (0.06)                 | 5 (0.31)                    | 2.36            | 3.28            |
| Barium               | 0.0277 | 0 (0.00)                         | 0 (0.00)                 | 0 (0.00)                    | 2.75            | 1.46            |
| Cadmium              | 0.0037 | 136 (4.19)                       | 77 (4.75)                | 59 (3.64)                   | 1.82            | 7.91            |
| Chromium             | 0.0321 | 3 (0.09)                         | 0 (0.00)                 | 3 (0.19)                    | 4.00            | 5.29            |
| Cobalt               | 0.0039 | 147 (4.53)                       | 80 (4.94)                | 67 (4.13)                   | 4.09            | 7.17            |
| Copper               | 0.1276 | 2 (0.06)                         | 0 (0.00)                 | 2 (0.12)                    | 1.16            | 2.47            |
| Iron                 | 0.4088 | 0 (0.00)                         | 0 (0.00)                 | 0 (0.00)                    | 2.57            | 2.29            |
| Lead                 | 0.0064 | 0 (0.00)                         | 0 (0.00)                 | 0 (0.00)                    | 3.12            | 5.91            |
| Manganese            | 0.0595 | 25 (0.77)                        | 13 (0.80)                | 12 (0.74)                   | 5.01            | 4.86            |
| Molybdenum           | 0.0330 | 110 (3.39)                       | 50 (3.08)                | 60 (3.70)                   | 5.80            | 7.67            |
| Nickel               | 0.0364 | 16 (0.49)                        | 10 (0.62)                | 6 (0.37)                    | 1.60            | 2.82            |
| Rubidium             | 0.0272 | 2 (0.06)                         | 0 (0.00)                 | 2 (0.12)                    | 2.01            | 1.65            |
| Selenium             | 0.0466 | 1 (0.03)                         | 0 (0.00)                 | 1 (0.06)                    | 3.62            | 1.01            |
| Strontium            | 0.0663 | 2 (0.06)                         | 0 (0.00)                 | 2 (0.12)                    | 4.38            | 1.82            |
| Thallium             | 0.0026 | 102 (3.15)                       | 12 (0.74)                | 90 (5.55)                   | 4.59            | 6.55            |
| Tin                  | 0.0198 | 2599 (80.17)                     | 1288 (79.46)             | 1311 (80.88)                | 5.71            | 6.33            |
| Titanium             | 0.1758 | 1 (0.03)                         | 0 (0.00)                 | 1 (0.06)                    | 4.10            | 2.57            |
| Tungsten             | 0.0548 | 3186 (98.27)                     | 1588 (97.96)             | 1598 (98.58)                | 7.92            | 8.8             |
| Uranium              | 0.0018 | 1752 (54.04)                     | 890 (54.90)              | 862 (53.18)                 | 6.28            | 7.15            |
| Vanadium             | 0.0046 | 2 (0.06)                         | 0 (0.00)                 | 2 (0.12)                    | 2.02            | 5.16            |
| Zinc                 | 0.4992 | 0 (0.00)                         | 0 (0.00)                 | 0 (0.00)                    | 1.11            | 3.21            |

Abbreviations: LOD, limit of detection; CV, coefficient of variation.

<sup>a</sup> Number and percentage of samples below LOD.

**Table S2. Correlations between plasma metals among the case-control participants (n = 3242).**

|    | Al   | As    | Ba    | Cd    | Co    | Cr    | Cu    | Fe     | Mn    | Mo     | Ni    | Pb    | Rb    | Sb     | Se     | Sr    | Ti    | Tl     | V                 | Zn    |
|----|------|-------|-------|-------|-------|-------|-------|--------|-------|--------|-------|-------|-------|--------|--------|-------|-------|--------|-------------------|-------|
| Al | 1.00 | 0.58* | 0.62* | 0.45* | 0.23* | 0.40* | -0.01 | 0.27*  | 0.66* | 0.21*  | 0.32* | 0.58* | 0.13* | 0.33*  | -0.01  | 0.35* | 0.30* | 0.19*  | 0.72*             | 0.66* |
| As |      | 1.00  | 0.71* | 0.24* | 0.21* | 0.29* | 0.00  | 0.24*  | 0.39* | 0.18*  | 0.16* | 0.45* | 0.15* | 0.21*  | 0.05*  | 0.31* | 0.22* | 0.23*  | 0.50*             | 0.55* |
| Ba |      |       | 1.00  | 0.34* | 0.12* | 0.37* | 0.01  | 0.27*  | 0.41* | 0.19*  | 0.27* | 0.59* | 0.14* | 0.10*  | 0.02   | 0.32* | 0.23* | 0.11*  | 0.54*             | 0.64* |
| Cd |      |       |       | 1.00  | 0.23* | 0.34* | -0.02 | 0.15*  | 0.39* | 0.20*  | 0.21* | 0.54* | 0.05* | 0.36*  | 0.01   | 0.26* | 0.20* | 0.19*  | 0.44*             | 0.35* |
| Co |      |       |       |       | 1.00  | 0.15* | 0.01  | 0.08*  | 0.33* | 0.22*  | 0.14* | 0.14* | 0.10* | 0.46*  | 0.00   | 0.18* | 0.14* | 0.41*  | 0.31*             | 0.13* |
| Cr |      |       |       |       |       | 1.00  | 0.08* | 0.23*  | 0.36* | 0.19*  | 0.26* | 0.37* | 0.17* | 0.16*  | 0.18*  | 0.25* | 0.34* | 0.14*  | 0.50*             | 0.41* |
| Cu |      |       |       |       |       |       | 1.00  | -0.12* | -0.02 | 0.09*  | 0.09* | -0.03 | -0.02 | -0.07* | 0.16*  | 0.13* | 0.08* | -0.07* | -0.03             | 0.02  |
| Fe |      |       |       |       |       |       |       | 1.00   | 0.21* | -0.06* | 0.12* | 0.22* | 0.31* | 0.06*  | 0.14*  | 0.12* | 0.13* | 0.13*  | 0.26*             | 0.33* |
| Mn |      |       |       |       |       |       |       |        | 1.00  | 0.18*  | 0.36* | 0.52* | 0.06* | 0.50*  | 0.01   | 0.30* | 0.32* | 0.29*  | 0.59*             | 0.38* |
| Mo |      |       |       |       |       |       |       |        |       | 1.00   | 0.10* | 0.18* | -0.01 | 0.14*  | 0.03   | 0.21* | 0.10* | 0.10*  | 0.26*             | 0.18* |
| Ni |      |       |       |       |       |       |       |        |       |        | 1.00  | 0.23* | 0.02  | 0.13*  | 0.12*  | 0.19* | 0.08* | 0.02   | 0.20*             | 0.21* |
| Pb |      |       |       |       |       |       |       |        |       |        |       | 1.00  | 0.09* | 0.27*  | -0.05* | 0.31* | 0.25* | 0.18*  | 0.55*             | 0.62* |
| Rb |      |       |       |       |       |       |       |        |       |        |       |       | 1.00  | 0.03   | 0.21*  | 0.08* | 0.14* | 0.23*  | 0.20*             | 0.31* |
| Sb |      |       |       |       |       |       |       |        |       |        |       |       |       | 1.00   | -0.08* | 0.14* | 0.14* | 0.47*  | 0.35*             | 0.13* |
| Se |      |       |       |       |       |       |       |        |       |        |       |       |       |        | 1.00   | 0.06* | 0.20* | 0.00   | 0.05 <sup>#</sup> | 0.08* |
| Sr |      |       |       |       |       |       |       |        |       |        |       |       |       |        |        | 1.00  | 0.21* | 0.12*  | 0.36*             | 0.32* |
| Ti |      |       |       |       |       |       |       |        |       |        |       |       |       |        |        |       | 1.00  | 0.09*  | 0.45*             | 0.30* |
| Tl |      |       |       |       |       |       |       |        |       |        |       |       |       |        |        |       |       | 1.00   | 0.25*             | 0.14* |
| V  |      |       |       |       |       |       |       |        |       |        |       |       |       |        |        |       |       |        | 1.00              | 0.69* |
| Zn |      |       |       |       |       |       |       |        |       |        |       |       |       |        |        |       |       |        |                   | 1.00  |

Abbreviations: Al, Aluminum; As, Arsenic; Ba, Barium; Cd, Cadmium; Co, Cobalt; Cr, Chromium; Cu, Copper; Fe, Iron; Mn, Manganese; Mo, Molybdenum; Ni, Nickel; Pb, Lead; Rb, Rubidium; Sb, Antimony; Se, Selenium; Sr, Strontium; Ti, Titanium; Tl, Thallium; V, Vanadium; Zn, Zinc.

Plasma tungsten, tin, and uranium concentrations were excluded from analysis because of many samples < LOD (98.3%, 80.2%, and 54.0%, respectively).

Samples < LOD were imputed before correlations were derived.

Spearman's rank correlation coefficients were shown in the table. \* $p < 0.01$  # $p < 0.05$

**Table S3. Basic characteristics of the study participants in the Metals Correlation Study at baseline (n = 94).**

| <b>Variables</b>                     | <b>Participants (n = 94)</b> |
|--------------------------------------|------------------------------|
| Age (years)                          | 43.8 ± 9.7                   |
| Male sex, No. (%)                    | 53 (56.4)                    |
| BMI (kg/m <sup>2</sup> )             | 24.6 ± 3.35                  |
| Smoking status, No. (%)              |                              |
| Current smoker                       | 23 (24.5)                    |
| Former smoker                        | 4 (4.3)                      |
| Never smoker                         | 67 (71.3)                    |
| Alcohol intake status, No. (%)       |                              |
| Current drinker                      | 40 (42.6)                    |
| Former drinker                       | 2 (2.1)                      |
| Never drinker                        | 52 (55.3)                    |
| Hypertension, No. (%) <sup>a</sup>   | 19 (19.4)                    |
| Hyperlipidemia, No. (%) <sup>b</sup> | 14 (14.9)                    |
| Diabetes, No. (%) <sup>c</sup>       | 3 (3.1)                      |

Abbreviations: BMI, body mass index.

Data are presented as mean ± SD, or number (percentage).

<sup>a</sup> Hypertension were defined as measured values ≥ 140 mmHg for SBP or ≥ 90 mmHg for DBP, self-reported physician diagnosis, or reported use of anti-hypertensive medication.

<sup>b</sup> Hyperlipidemia were defined as total cholesterol ≥ 5.72 mmol/L, triglycerides ≥ 1.70 mmol/L, or a self-reported physician diagnosis, or anti-hyperlipidemia medication use.

<sup>c</sup> Diabetes was defined as fasting glucose ≥ 7.0 mmol/L, self-reported physician diagnosis, or anti-diabetic medication use (insulin or oral hypoglycemic agents).

**Table S4. Metal concentrations and correlations between plasma, whole blood and urine samples in the Metals Correlation Study (n = 94).**

| Metals     | Median concentration (IQR) |                                                                     |                                    | Correlation $r_s$ , <sup>b</sup> ( <i>p</i> -Value) |                |
|------------|----------------------------|---------------------------------------------------------------------|------------------------------------|-----------------------------------------------------|----------------|
|            | Plasma $\mu\text{g/L}$     | Whole blood $\mu\text{g/L}$                                         | Urine <sup>a</sup> $\mu\text{g/g}$ | Plasma-whole blood                                  | Plasma-urine   |
| Aluminum   | 128.68 (21.68, 155.85)     | 103.35 (56.19, 137.29)                                              | 6.98 (4.19, 11.98)                 | 0.73 (< 0.001)                                      | -0.06 (0.6)    |
| Antimony   | 0.13 (0.10, 0.22)          | 0.09 (0.09, 0.18)                                                   | 0.03 (0.02, 0.04)                  | 0.19 (0.07)                                         | 0.04 (0.74)    |
| Arsenic    | 3.32 (2.41, 4.01)          | 2.46 (1.89, 3.30)                                                   | 5.95 (4.02, 9.14)                  | 0.68 (< 0.001)                                      | 0.34 (0.001)   |
| Barium     | 39.27 (32.03, 50.94)       | 20.46 (13.80, 25.17)                                                | 2.16 (1.27, 4.06)                  | 0.59 (< 0.001)                                      | 0.07 (0.52)    |
| Cadmium    | 0.11 (0.04, 0.18)          | 0.66 (0.43, 1.58)                                                   | 0.20 (0.13, 0.29)                  | 0.11 (0.28)                                         | 0.07 (0.5)     |
| Chromium   | 3.20 (2.86, 3.60)          | 4.59 (3.43, 5.43)                                                   | 0.28 (0.21, 0.38)                  | -0.09 (0.41)                                        | 0.1 (0.36)     |
| Cobalt     | 0.17 (0.11, 0.24)          | 0.14 (0.10, 0.20)                                                   | 0.08 (0.06, 0.13)                  | 0.45 (< 0.001)                                      | 0.42 (< 0.001) |
| Copper     | 954.34 (837.75, 1066.19)   | 752.93 (677.84, 836.52)                                             | 2.25 (1.86, 2.94)                  | 0.75 (< 0.001)                                      | 0.05 (0.64)    |
| Iron       | 1393.33 (1026.80, 1687.59) | 4.44×10 <sup>5</sup> (3.93×10 <sup>5</sup> , 4.91×10 <sup>5</sup> ) | 8.31 (5.28, 14.39)                 | 0.17 (0.11)                                         | 0.02 (0.88)    |
| Lead       | 7.28 (6.44, 8.54)          | 28.23 (22.92, 37.77)                                                | 0.60 (0.45, 0.84)                  | 0.23 (0.03)                                         | 0.03 (0.77)    |
| Manganese  | 6.13 (2.16, 6.84)          | 11.89 (9.97, 13.83)                                                 | 0.33 (0.18, 0.55)                  | 0.38 (< 0.001)                                      | -0.19 (0.06)   |
| Molybdenum | 1.16 (0.94, 1.41)          | 0.66 (0.53, 0.85)                                                   | 13.94 (9.68, 23.97)                | 0.73 (< 0.001)                                      | 0.53 (< 0.001) |
| Nickel     | 1.54 (0.41, 2.00)          | 3.50 (2.34, 5.49)                                                   | 0.53 (0.37, 0.82)                  | 0.18 (0.09)                                         | -0.05 (0.61)   |
| Rubidium   | 309.43 (251.65, 349.13)    | 2143.40 (1888.54, 2431.04)                                          | 502.42 (378.00, 676.71)            | 0.64 (< 0.001)                                      | 0.03 (0.77)    |
| Selenium   | 83.64 (68.38, 96.18)       | 83.26 (74.68, 96.27)                                                | 3.78 (2.83, 5.14)                  | 0.52 (< 0.001)                                      | 0.64 (< 0.001) |
| Strontium  | 36.88 (31.24, 42.03)       | 20.07 (17.51, 24.36)                                                | 36.20 (22.40, 57.47)               | 0.71 (< 0.001)                                      | 0.29 (0.005)   |
| Thallium   | 0.29 (0.19, 0.41)          | 0.18 (0.12, 0.23)                                                   | 0.16 (0.12, 0.24)                  | 0.73 (< 0.001)                                      | 0.13 (0.22)    |
| Titanium   | 41.15 (37.14, 45.41)       | 73.00 (63.43, 81.92)                                                | 35.41 (24.27, 46.20)               | 0.12 (0.25)                                         | 0.32 (0.002)   |
| Vanadium   | 0.98 (0.89, 1.07)          | 0.62 (0.49, 0.74)                                                   | 0.32 (0.26, 0.46)                  | 0.23 (0.03)                                         | 0.26 (0.01)    |
| Zinc       | 909.94 (822.04, 1010.45)   | 5184.98 (4747.69, 5877.37)                                          | 72.56 (50.56, 97.90)               | 0.14 (0.19)                                         | 0.23 (0.03)    |

<sup>a</sup> Urine metals are creatinine-standardized  $\mu\text{g/g}$ .

<sup>b</sup> Spearman correlation coefficients.

Tin, tungsten, and uranium were excluded because of many samples < LOD.

**Table S5. Adjusted odds ratios (95% CI) for incident CHD according to quartiles of exposure for plasma metals included in the single-metal model. <sup>a</sup>**

| Plasma metals       | Quartiles of plasma metals ( $\mu\text{g/L}$ ) <sup>b</sup> |                   |                   |                   | <i>p</i> -Trend <sup>c</sup> | <i>FDR</i> <sup>d</sup> |
|---------------------|-------------------------------------------------------------|-------------------|-------------------|-------------------|------------------------------|-------------------------|
|                     | Q1                                                          | Q2                | Q3                | Q4                |                              |                         |
| Aluminum            | < 31.03                                                     | 31.03–48.95       | 48.95–97.15       | > 97.15           |                              |                         |
| N (case/control)    | 358/405                                                     | 349/405           | 395/405           | 519/406           |                              |                         |
| Odds ratio (95% CI) | 1.00                                                        | 0.93 (0.74, 1.16) | 1.05 (0.83, 1.32) | 1.33 (1.07, 1.65) | 0.001                        | 0.009                   |
| Antimony            | < 0.09                                                      | 0.09–0.14         | 0.14–0.22         | > 0.22            |                              |                         |
| N (case/control)    | 404/405                                                     | 428/405           | 427/405           | 362/406           |                              |                         |
| Odds ratio (95% CI) | 1.00                                                        | 1.06 (0.85, 1.31) | 1.00 (0.80, 1.26) | 0.88 (0.70, 1.12) | 0.25                         | 0.38                    |
| Arsenic             | < 1.28                                                      | 1.28–1.96         | 1.96–3.49         | > 3.49            |                              |                         |
| N (case/control)    | 323/405                                                     | 357/405           | 369/405           | 572/406           |                              |                         |
| Odds ratio (95% CI) | 1.00                                                        | 1.17 (0.93, 1.48) | 1.12 (0.89, 1.40) | 1.68 (1.35, 2.09) | < 0.001                      | < 0.001                 |
| Barium              | < 23.26                                                     | 23.26–35.48       | 35.48–62.52       | > 62.52           |                              |                         |
| N (case/control)    | 328/405                                                     | 375/405           | 424/405           | 494/406           |                              |                         |
| Odds ratio (95% CI) | 1.00                                                        | 1.21 (0.96, 1.53) | 1.25 (1.00, 1.56) | 1.44 (1.15, 1.79) | 0.002                        | 0.011                   |
| Cobalt              | < 0.12                                                      | 0.12–0.15         | 0.15–0.20         | > 0.20            |                              |                         |
| N (case/control)    | 420/405                                                     | 386/405           | 438/405           | 377/406           |                              |                         |
| Odds ratio (95% CI) | 1.00                                                        | 0.88 (0.71, 1.10) | 0.99 (0.79, 1.24) | 0.88 (0.70, 1.10) | 0.39                         | 0.55                    |
| Copper              | < 856.11                                                    | 856.11–962.14     | 962.148–1072.48   | > 1072.48         |                              |                         |
| N (case/control)    | 373/405                                                     | 389/405           | 388/405           | 471/406           |                              |                         |
| Odds ratio (95% CI) | 1.00                                                        | 1.02 (0.82, 1.27) | 0.99 (0.79, 1.24) | 1.20 (0.95, 1.50) | 0.16                         | 0.29                    |
| Lead                | < 8.84                                                      | 8.84–13.12        | 13.12–20.70       | > 20.70           |                              |                         |
| N (case/control)    | 329/405                                                     | 424/405           | 413/405           | 455/406           |                              |                         |
| Odds ratio (95% CI) | 1.00                                                        | 1.34 (1.07, 1.68) | 1.31 (1.04, 1.65) | 1.30 (1.03, 1.63) | 0.15                         | 0.29                    |
| Manganese           | < 2.97                                                      | 2.97–4.05         | 4.05–5.72         | > 5.72            |                              |                         |
| N (case/control)    | 327/405                                                     | 433/405           | 450/405           | 411/406           |                              |                         |
| Odds ratio (95% CI) | 1.00                                                        | 1.27 (1.01, 1.58) | 1.38 (1.10, 1.72) | 1.18 (0.94, 1.48) | 0.17                         | 0.29                    |
| Molybdenum          | < 1.09                                                      | 1.09–1.36         | 1.36–1.74         | > 1.74            |                              |                         |
| N (case/control)    | 400/405                                                     | 408/405           | 378/405           | 435/406           |                              |                         |
| Odds ratio (95% CI) | 1.00                                                        | 1.10 (0.89, 1.37) | 1.05 (0.84, 1.30) | 1.08 (0.87, 1.35) | 0.59                         | 0.66                    |
| Nickel              | < 2.17                                                      | 2.17–3.03         | 3.03–4.54         | > 4.54            |                              |                         |
| N (case/control)    | 380/405                                                     | 410/405           | 409/405           | 422/406           |                              |                         |
| Odds ratio (95% CI) | 1.00                                                        | 0.98 (0.79, 1.22) | 1.06 (0.85, 1.33) | 0.97 (0.76, 1.22) | 0.87                         | 0.87                    |
| Rubidium            | < 318.27                                                    | 318.27–357.09     | 357.09–399.29     | > 399.29          |                              |                         |
| N (case/control)    | 426/405                                                     | 411/405           | 375/405           | 409/406           |                              |                         |
| Odds ratio (95% CI) | 1.00                                                        | 0.98 (0.78, 1.22) | 0.77 (0.62, 0.96) | 0.84 (0.67, 1.05) | 0.05                         | 0.14                    |
| Selenium            | < 57.69                                                     | 57.69–67.48       | 67.48–78.66       | > 78.66           |                              |                         |
| N (case/control)    | 438/405                                                     | 437/405           | 392/406           | 354/405           |                              |                         |
| Odds ratio (95% CI) | 1.00                                                        | 0.97 (0.79, 1.19) | 0.88 (0.71, 1.10) | 0.72 (0.57, 0.91) | 0.007                        | 0.03                    |
| Strontium           | < 30.13                                                     | 30.13–35.91       | 35.91–42.30       | > 42.30           |                              |                         |
| N (case/control)    | 368/405                                                     | 388/405           | 387/405           | 478/406           |                              |                         |
| Odds ratio (95% CI) | 1.00                                                        | 1.03 (0.83, 1.28) | 0.99 (0.79, 1.23) | 1.10 (0.89, 1.37) | 0.42                         | 0.55                    |
| Thallium            | < 0.10                                                      | 0.10–0.13         | 0.13–0.18         | > 0.18            |                              |                         |
| N (case/control)    | 394/405                                                     | 357/405           | 416/405           | 454/406           |                              |                         |
| Odds ratio (95% CI) | 1.00                                                        | 0.84 (0.68, 1.05) | 1.01 (0.81, 1.26) | 1.15 (0.91, 1.44) | 0.10                         | 0.24                    |

(continued)

| Plasma metals       | Quartiles of plasma metals ( $\mu\text{g/L}$ ) <sup>b</sup> |                   |                   |                   | <i>p</i> -Trend <sup>c</sup> | FDR <sup>d</sup> |
|---------------------|-------------------------------------------------------------|-------------------|-------------------|-------------------|------------------------------|------------------|
|                     | Q1                                                          | Q2                | Q3                | Q4                |                              |                  |
| Titanium            | < 24.42                                                     | 24.42–29.14       | 29.14–35.70       | > 35.70           |                              |                  |
| N (case/control)    | 319/405                                                     | 396/405           | 441/405           | 465/406           |                              |                  |
| Odds ratio (95% CI) | 1.00                                                        | 1.28 (1.02, 1.61) | 1.35 (1.07, 1.69) | 1.37 (1.09, 1.73) | 0.010                        | 0.03             |
| Vanadium            | < 0.53                                                      | 0.53–0.67         | 0.67–0.99         | > 0.99            |                              |                  |
| N (case/control)    | 368/405                                                     | 415/405           | 425/405           | 413/406           |                              |                  |
| Odds ratio (95% CI) | 1.00                                                        | 1.24 (0.98, 1.56) | 1.20 (0.96, 1.50) | 1.05 (0.84, 1.32) | 0.79                         | 0.84             |
| Zinc                | < 1015.20                                                   | 1015.20–1193.53   | 1193.53–2623.42   | > 2623.42         |                              |                  |
| N (case/control)    | 340/405                                                     | 379/405           | 462/405           | 440/406           |                              |                  |
| Odds ratio (95% CI) | 1.00                                                        | 1.02 (0.81, 1.29) | 1.27 (1.01, 1.59) | 1.13 (0.91, 1.41) | 0.47                         | 0.57             |

<sup>a</sup> Metals were included in the conditional logistic regression models separately (single-metal model), and adjusted for BMI, smoking status, pack year, alcohol intake status, education, physical activity, hypertension, hyperlipidemia, CHD family history, diabetes, and eGFR.

<sup>b</sup> Plasma metal concentration was presented as raw data.

<sup>c</sup> *p*-Trend across quartiles of metals were obtained by including the median of each quartile (natural log-transformed) as a continuous variable in logistic regression models.

<sup>d</sup> False Discovery Rate (FDR) adjusted *p*-Values [using software published by Pike (2011)].



**Table S6. Adjusted odds ratios (95% CI) for incident CHD according to quartiles of exposure for plasma metals included in the multiple-metal model.**

| Plasma Metals        | Quartiles of plasma metals ( $\mu\text{g/L}$ ) <sup>a</sup> |                   |                   |                   | <i>p</i> -Trend <sup>b</sup> |
|----------------------|-------------------------------------------------------------|-------------------|-------------------|-------------------|------------------------------|
|                      | Q1                                                          | Q2                | Q3                | Q4                |                              |
| Aluminum             | < 31.03                                                     | 31.03–48.95       | 48.95–97.15       | > 97.15           |                              |
| N (case/control)     | 358/405                                                     | 349/405           | 395/405           | 519/406           |                              |
| Model 1 <sup>c</sup> | 1.00                                                        | 0.85 (0.67, 1.08) | 0.90 (0.70, 1.15) | 0.94 (0.71, 1.25) | 0.83                         |
| Model 2 <sup>d</sup> | 1.00                                                        | 0.85 (0.67, 1.08) | 0.89 (0.70, 1.14) | 0.94 (0.71, 1.24) | 0.86                         |
| Model 3 <sup>e</sup> | 1.00                                                        | 0.85 (0.67, 1.08) | 0.90 (0.70, 1.15) | 0.94 (0.71, 1.24) | 0.87                         |
| Arsenic              | < 1.28                                                      | 1.28–1.96         | 1.96–3.49         | > 3.49            |                              |
| N (case/control)     | 323/405                                                     | 357/405           | 369/405           | 572/406           |                              |
| Model 1              | 1.00                                                        | 1.17 (0.91, 1.50) | 1.15 (0.88, 1.50) | 1.78 (1.29, 2.46) | 0.001                        |
| Model 2              | 1.00                                                        | 1.16 (0.91, 1.50) | 1.14 (0.87, 1.49) | 1.74 (1.26, 2.41) | 0.001                        |
| Model 3              | 1.00                                                        | 1.16 (0.90, 1.49) | 1.13 (0.86, 1.47) | 1.74 (1.26, 2.41) | 0.002                        |
| Barium               | < 23.26                                                     | 23.26–35.48       | 35.48–62.52       | > 62.52           |                              |
| N (case/control)     | 328/405                                                     | 375/405           | 424/405           | 494/406           |                              |
| Model 1              | 1.00                                                        | 1.15 (0.90, 1.47) | 1.03 (0.79, 1.34) | 0.91 (0.66, 1.25) | 0.41                         |
| Model 2              | 1.00                                                        | 1.14 (0.89, 1.45) | 1.03 (0.79, 1.35) | 0.91 (0.66, 1.25) | 0.44                         |
| Model 3              | 1.00                                                        | 1.13 (0.89, 1.45) | 1.03 (0.79, 1.35) | 0.92 (0.66, 1.26) | 0.46                         |
| Selenium             | < 57.69                                                     | 57.69–67.48       | 67.48–78.66       | > 78.66           |                              |
| N (case/control)     | 438/405                                                     | 437/405           | 392/406           | 354/405           |                              |
| Model 1              | 1.00                                                        | 0.92 (0.74, 1.14) | 0.80 (0.64, 1.00) | 0.67 (0.52, 0.85) | 0.001                        |
| Model 2              | 1.00                                                        | 0.93 (0.75, 1.15) | 0.80 (0.64, 1.01) | 0.67 (0.52, 0.85) | 0.001                        |
| Model 3              | 1.00                                                        | 0.93 (0.75, 1.16) | 0.80 (0.63, 1.00) | 0.67 (0.52, 0.85) | 0.001                        |
| Titanium             | < 24.42                                                     | 24.42–29.14       | 29.14–35.70       | > 35.70           |                              |
| N (case/control)     | 319/405                                                     | 396/405           | 441/405           | 465/406           |                              |
| Model 1              | 1.00                                                        | 1.28 (1.01, 1.62) | 1.33 (1.05, 1.69) | 1.32 (1.03, 1.69) | 0.04                         |
| Model 2              | 1.00                                                        | 1.28 (1.01, 1.63) | 1.35 (1.06, 1.71) | 1.33 (1.04, 1.71) | 0.03                         |
| Model 3              | 1.00                                                        | 1.29 (1.02, 1.64) | 1.36 (1.07, 1.73) | 1.33 (1.04, 1.71) | 0.03                         |

<sup>a</sup> Plasma metal concentration was presented as raw data.

<sup>b</sup> *p*-Trend across quartiles of metals were obtained by including the median of each quartile (natural log-transformed) as a continuous variable in logistic regression models.

<sup>c</sup> Model 1 Metals that were significant in the single-metal model (FDR < 0.05) were included in the conditional logistic regression model simultaneously (multiple-metals model) and adjusted for BMI, smoking status, pack year, alcohol intake status, education, physical activity, hypertension, hyperlipidemia, family history of coronary heart disease, diabetes, eGFR.

<sup>d</sup> Model 2 Further adjusted for occupational categories (six categories).

<sup>e</sup> Model 3 Further adjusted for occupational categories (six categories) and consumption habit (yes or no) of meat, fish or seafood, milk or dairy products, beans or soy foods, fruits or vegetables. If the participant reported eating the food five or more times per week, the response would be 'yes'.

**Table S7. Adjusted odds ratios (95% CI) for incident CHD in subgroups stratified by age, sex, body mass index, smoking status, hypertension, diabetes, and renal function.<sup>a</sup>**

| <b>Variables</b>                           | <b>Q1</b> | <b>Q2</b>         | <b>Q3</b>         | <b>Q4</b>         | <b>p-Trend<sup>b</sup></b> |
|--------------------------------------------|-----------|-------------------|-------------------|-------------------|----------------------------|
| <b>Arsenic</b>                             |           |                   |                   |                   |                            |
| <b>Age &lt; 65 (n = 1546)</b>              |           |                   |                   |                   |                            |
| N (case/control)                           | 163/210   | 171/192           | 164/181           | 275/190           |                            |
| OR (95% CI)                                | 1.00      | 1.10 (0.80, 1.53) | 1.13 (0.79, 1.61) | 1.68 (1.09, 2.58) | 0.03                       |
| <b>Age ≥ 65 (n = 1696)</b>                 |           |                   |                   |                   |                            |
| N (case/control)                           | 160/195   | 186/213           | 205/224           | 297/216           |                            |
| OR (95% CI)                                | 1.00      | 1.04 (0.75, 1.44) | 0.99 (0.70, 1.40) | 1.53 (1.01, 2.30) | 0.05                       |
| <b>Men (n = 1578)</b>                      |           |                   |                   |                   |                            |
| N (case/control)                           | 161/179   | 181/211           | 196/221           | 251/178           |                            |
| OR (95% CI)                                | 1.00      | 0.86 (0.62, 1.18) | 0.87 (0.62, 1.22) | 1.33 (0.87, 2.02) | 0.20                       |
| <b>Women (n = 1664)</b>                    |           |                   |                   |                   |                            |
| N (case/control)                           | 162/226   | 176/194           | 173/184           | 321/228           |                            |
| OR (95% CI)                                | 1.00      | 1.38 (0.99, 1.92) | 1.29 (0.90, 1.85) | 1.98 (1.30, 3.03) | 0.003                      |
| <b>BMI &lt; 25 (n = 1841)</b>              |           |                   |                   |                   |                            |
| N (case/control)                           | 175/255   | 168/241           | 196/254           | 307/245           |                            |
| OR (95% CI)                                | 1.00      | 0.96 (0.70, 1.30) | 1.03 (0.74, 1.43) | 1.53 (1.04, 2.26) | 0.03                       |
| <b>BMI ≥ 25 (n = 1401)</b>                 |           |                   |                   |                   |                            |
| N (case/control)                           | 148/150   | 189/164           | 173/151           | 265/161           |                            |
| OR (95% CI)                                | 1.00      | 1.17 (0.82, 1.66) | 1.06 (0.72, 1.55) | 1.71 (1.08, 2.72) | 0.04                       |
| <b>Never-smokers (n = 2211)</b>            |           |                   |                   |                   |                            |
| N (case/control)                           | 205/289   | 235/277           | 242/277           | 392/294           |                            |
| OR (95% CI)                                | 1.00      | 1.20 (0.90, 1.59) | 1.17 (0.86, 1.59) | 1.78 (1.23, 2.56) | 0.003                      |
| <b>Ever-smokers<sup>c</sup> (n = 1031)</b> |           |                   |                   |                   |                            |
| N (case/control)                           | 118/116   | 122/128           | 127/128           | 180/112           |                            |
| OR (95% CI)                                | 1.00      | 0.88 (0.59, 1.31) | 0.86 (0.56, 1.32) | 1.26 (0.75, 2.12) | 0.38                       |
| <b>Hypertension (n = 1773)</b>             |           |                   |                   |                   |                            |
| N (case/control)                           | 200/154   | 220/149           | 256/179           | 398/217           |                            |
| OR (95% CI)                                | 1.00      | 1.15 (0.83, 1.59) | 1.18 (0.83, 1.67) | 1.62 (1.07, 2.45) | 0.02                       |
| <b>No Hypertension (n = 1469)</b>          |           |                   |                   |                   |                            |
| N (case/control)                           | 123/251   | 137/256           | 113/226           | 174/189           |                            |
| OR (95% CI)                                | 1.00      | 1.04 (0.75, 1.44) | 0.97 (0.68, 1.39) | 1.69 (1.09, 2.61) | 0.05                       |
| <b>Diabetes (n = 554)</b>                  |           |                   |                   |                   |                            |
| N (case/control)                           | 75/38     | 92/38             | 95/47             | 121/48            |                            |
| OR (95% CI)                                | 1.00      | 1.61 (0.85, 3.02) | 1.54 (0.79, 3.01) | 2.23 (0.99, 4.99) | 0.07                       |
| <b>No Diabetes (n = 2688)</b>              |           |                   |                   |                   |                            |
| N (case/control)                           | 248/367   | 265/367           | 274/358           | 451/358           |                            |
| OR (95% CI)                                | 1.00      | 1.02 (0.80, 1.31) | 1.03 (0.79, 1.35) | 1.54 (1.12, 2.12) | 0.012                      |
| <b>eGFR &lt; 90 (n = 2041)</b>             |           |                   |                   |                   |                            |
| N (case/control)                           | 192/223   | 218/246           | 243/239           | 415/265           |                            |
| OR (95% CI)                                | 1.00      | 0.97 (0.72, 1.30) | 0.98 (0.71, 1.35) | 1.59 (1.09, 2.32) | 0.009                      |
| <b>eGFR ≥ 90 (n = 1201)</b>                |           |                   |                   |                   |                            |
| N (case/control)                           | 131/182   | 139/159           | 126/166           | 157/141           |                            |
| OR (95% CI)                                | 1.00      | 1.35 (0.94, 1.94) | 1.20 (0.81, 1.78) | 1.60 (0.97, 2.62) | 0.11                       |

(continued)

| Variables                                  | Q1      | Q2                | Q3                | Q4                | p-Trend <sup>b</sup> |
|--------------------------------------------|---------|-------------------|-------------------|-------------------|----------------------|
| <b>Selenium</b>                            |         |                   |                   |                   |                      |
| <b>Age &lt; 65 (n = 1546)</b>              |         |                   |                   |                   |                      |
| N (case/control)                           | 218/197 | 219/188           | 179/205           | 157/183           |                      |
| OR (95% CI)                                | 1.00    | 1.07 (0.80, 1.43) | 0.75 (0.55, 1.03) | 0.71 (0.52, 0.98) | 0.012                |
| <b>Age ≥ 65 (n = 1696)</b>                 |         |                   |                   |                   |                      |
| N (case/control)                           | 220/208 | 218/217           | 213/201           | 197/222           |                      |
| OR (95% CI)                                | 1.00    | 0.87 (0.65, 1.16) | 0.98 (0.73, 1.32) | 0.78 (0.57, 1.05) | 0.20                 |
| <b>Men (n = 1578)</b>                      |         |                   |                   |                   |                      |
| N (case/control)                           | 239/221 | 221/194           | 185/180           | 144/194           |                      |
| OR (95% CI)                                | 1.00    | 0.99 (0.74, 1.31) | 0.91 (0.67, 1.23) | 0.61 (0.45, 0.83) | 0.004                |
| <b>Women (n = 1664)</b>                    |         |                   |                   |                   |                      |
| N (case/control)                           | 199/184 | 216/211           | 207/226           | 210/211           |                      |
| OR (95% CI)                                | 1.00    | 0.97 (0.72, 1.32) | 0.81 (0.60, 1.11) | 0.89 (0.65, 1.21) | 0.35                 |
| <b>BMI &lt; 25 (n = 1841)</b>              |         |                   |                   |                   |                      |
| N (case/control)                           | 234/258 | 226/244           | 198/238           | 188/255           |                      |
| OR (95% CI)                                | 1.00    | 0.95 (0.72, 1.25) | 0.90 (0.67, 1.19) | 0.71 (0.52, 0.95) | 0.03                 |
| <b>BMI ≥ 25 (n = 1401)</b>                 |         |                   |                   |                   |                      |
| N (case/control)                           | 204/147 | 211/161           | 194/168           | 166/150           |                      |
| OR (95% CI)                                | 1.00    | 0.98 (0.71, 1.34) | 0.81 (0.59, 1.12) | 0.78 (0.56, 1.09) | 0.08                 |
| <b>Never-smokers (n = 2211)</b>            |         |                   |                   |                   |                      |
| N (case/control)                           | 259/247 | 281/276           | 277/310           | 257/304           |                      |
| OR (95% CI)                                | 1.00    | 0.94 (0.73, 1.23) | 0.79 (0.60, 1.02) | 0.71 (0.54, 0.93) | 0.007                |
| <b>Ever-smokers<sup>c</sup> (n = 1031)</b> |         |                   |                   |                   |                      |
| N (case/control)                           | 179/158 | 156/129           | 115/96            | 97/101            |                      |
| OR (95% CI)                                | 1.00    | 1.06 (0.75, 1.48) | 1.03 (0.71, 1.50) | 0.80 (0.54, 1.18) | 0.39                 |
| <b>Hypertension (n = 1773)</b>             |         |                   |                   |                   |                      |
| N (case/control)                           | 311/185 | 282/183           | 250/167           | 231/164           |                      |
| OR (95% CI)                                | 1.00    | 0.85 (0.65, 1.12) | 0.81 (0.61, 1.09) | 0.74 (0.55, 1.00) | 0.07                 |
| <b>No Hypertension (n = 1469)</b>          |         |                   |                   |                   |                      |
| N (case/control)                           | 127/220 | 155/222           | 142/239           | 123/241           |                      |
| OR (95% CI)                                | 1.00    | 1.12 (0.81, 1.53) | 0.87 (0.63, 1.21) | 0.71 (0.51, 1.01) | 0.018                |
| <b>Diabetes (n = 554)</b>                  |         |                   |                   |                   |                      |
| N (case/control)                           | 88/33   | 96/39             | 103/42            | 96/57             |                      |
| OR (95% CI)                                | 1.00    | 1.00 (0.56, 1.79) | 0.91 (0.51, 1.63) | 0.63 (0.36, 1.12) | 0.08                 |
| <b>No Diabetes (n = 2688)</b>              |         |                   |                   |                   |                      |
| N (case/control)                           | 350/372 | 341/366           | 289/364           | 258/348           |                      |
| OR (95% CI)                                | 1.00    | 0.96 (0.77, 1.19) | 0.82 (0.65, 1.03) | 0.76 (0.59, 0.96) | 0.019                |
| <b>eGFR &lt; 90 (n = 2041)</b>             |         |                   |                   |                   |                      |
| N (case/control)                           | 296/255 | 283/249           | 263/234           | 226/235           |                      |
| OR (95% CI)                                | 1.00    | 0.94 (0.73, 1.22) | 0.91 (0.70, 1.20) | 0.77 (0.58, 1.01) | 0.10                 |
| <b>eGFR ≥ 90 (n = 1201)</b>                |         |                   |                   |                   |                      |
| N (case/control)                           | 142/150 | 154/156           | 129/172           | 128/170           |                      |
| OR (95% CI)                                | 1.00    | 1.01 (0.72, 1.43) | 0.76 (0.53, 1.09) | 0.75 (0.52, 1.09) | 0.03                 |

(continued)

| Variables                                  | Q1      | Q2                | Q3                | Q4                | <i>p</i> -Trend <sup>b</sup> |
|--------------------------------------------|---------|-------------------|-------------------|-------------------|------------------------------|
| <b>Titanium</b>                            |         |                   |                   |                   |                              |
| <b>Age &lt; 65 (n = 1546)</b>              |         |                   |                   |                   |                              |
| N (case/control)                           | 163/195 | 193/196           | 205/189           | 212/193           |                              |
| OR (95% CI)                                | 1.00    | 1.21 (0.88, 1.65) | 1.24 (0.90, 1.70) | 1.15 (0.83, 1.60) | 0.52                         |
| <b>Age ≥ 65 (n = 1696)</b>                 |         |                   |                   |                   |                              |
| N (case/control)                           | 156/210 | 203/209           | 236/216           | 253/213           |                              |
| OR (95% CI)                                | 1.00    | 1.38 (1.01, 1.88) | 1.42 (1.04, 1.94) | 1.45 (1.06, 1.99) | 0.05                         |
| <b>Men (n = 1578)</b>                      |         |                   |                   |                   |                              |
| N (case/control)                           | 176/228 | 196/203           | 204/182           | 213/176           |                              |
| OR (95% CI)                                | 1.00    | 1.36 (1.01, 1.85) | 1.45 (1.07, 1.97) | 1.48 (1.07, 2.04) | 0.02                         |
| <b>Women (n = 1664)</b>                    |         |                   |                   |                   |                              |
| N (case/control)                           | 143/177 | 200/202           | 237/223           | 252/230           |                              |
| OR (95% CI)                                | 1.00    | 1.24 (0.90, 1.72) | 1.19 (0.86, 1.64) | 1.13 (0.82, 1.59) | 0.71                         |
| <b>BMI &lt; 25 (n = 1841)</b>              |         |                   |                   |                   |                              |
| N (case/control)                           | 152/250 | 209/255           | 237/257           | 248/233           |                              |
| OR (95% CI)                                | 1.00    | 1.39 (1.03, 1.86) | 1.40 (1.04, 1.89) | 1.49 (1.08, 2.03) | 0.02                         |
| <b>BMI ≥ 25 (n = 1401)</b>                 |         |                   |                   |                   |                              |
| N (case/control)                           | 167/155 | 187/150           | 204/148           | 217/173           |                              |
| OR (95% CI)                                | 1.00    | 1.18 (0.85, 1.65) | 1.24 (0.89, 1.74) | 1.09 (0.77, 1.52) | 0.80                         |
| <b>Never-smokers (n = 2211)</b>            |         |                   |                   |                   |                              |
| N (case/control)                           | 199/252 | 261/295           | 303/291           | 311/299           |                              |
| OR (95% CI)                                | 1.00    | 1.11 (0.85, 1.46) | 1.21 (0.91, 1.59) | 1.13 (0.85, 1.50) | 0.47                         |
| <b>Ever-smokers<sup>c</sup> (n = 1031)</b> |         |                   |                   |                   |                              |
| N (case/control)                           | 120/153 | 135/110           | 138/114           | 154/107           |                              |
| OR (95% CI)                                | 1.00    | 1.65 (1.14, 2.40) | 1.49 (1.02, 2.16) | 1.64 (1.11, 2.42) | 0.03                         |
| <b>Hypertension (n = 1773)</b>             |         |                   |                   |                   |                              |
| N (case/control)                           | 214/164 | 249/161           | 303/181           | 308/193           |                              |
| OR (95% CI)                                | 1.00    | 1.22 (0.90, 1.65) | 1.26 (0.93, 1.69) | 1.22 (0.90, 1.65) | 0.36                         |
| <b>No Hypertension (n = 1469)</b>          |         |                   |                   |                   |                              |
| N (case/control)                           | 105/241 | 147/244           | 138/224           | 157/213           |                              |
| OR (95% CI)                                | 1.00    | 1.41 (1.01, 1.95) | 1.39 (0.99, 1.95) | 1.48 (1.05, 2.09) | 0.04                         |
| <b>Diabetes (n = 554)</b>                  |         |                   |                   |                   |                              |
| N (case/control)                           | 90/32   | 81/41             | 110/47            | 102/51            |                              |
| OR (95% CI)                                | 1.00    | 0.72 (0.39, 1.32) | 0.84 (0.47, 1.52) | 0.72 (0.40, 1.30) | 0.38                         |
| <b>No Diabetes (n = 2688)</b>              |         |                   |                   |                   |                              |
| N (case/control)                           | 229/373 | 315/364           | 331/358           | 363/355           |                              |
| OR (95% CI)                                | 1.00    | 1.42 (1.12, 1.81) | 1.42 (1.11, 1.81) | 1.46 (1.14, 1.87) | 0.013                        |
| <b>eGFR &lt; 90 (n = 2041)</b>             |         |                   |                   |                   |                              |
| N (case/control)                           | 204/248 | 261/243           | 293/238           | 310/244           |                              |
| OR (95% CI)                                | 1.00    | 1.28 (0.97, 1.69) | 1.37 (1.03, 1.80) | 1.37 (1.03, 1.83) | 0.06                         |
| <b>eGFR ≥ 90 (n = 1201)</b>                |         |                   |                   |                   |                              |
| N (case/control)                           | 115/157 | 135/162           | 148/167           | 155/162           |                              |
| OR (95% CI)                                | 1.00    | 1.29 (0.89, 1.86) | 1.25 (0.87, 1.81) | 1.24 (0.85, 1.81) | 0.34                         |

Quartiles for each metal were defined as shown in Table 2. <sup>a</sup> Unconditional logistic regression models were used in the subgroup analysis. All stratified models included metals left in the multiple-metals model, and adjusted for age, sex, BMI, smoking status, pack year, alcohol intake status, education, physical activity, hypertension, hyperlipidemia, family history of coronary heart disease, diabetes, and eGFR (except for the corresponding stratified variable). <sup>b</sup> *p*-Trend across quartiles of metals were obtained by including the median of each quartile (natural log-transformed) as a continuous variable in logistic regression models. <sup>c</sup> Ever-smokers included current and former smokers.

**Table S8. Comparison of baseline basic characteristics of the study participants in the case-control study (n = 1621) and Metals Variability Study (n = 138).**

| <b>Variables</b>                             | <b>Controls in the nested case-control study (n = 1621)</b> | <b>Participants in the metals variability study (n = 138)</b> | <b>p-Value <sup>a</sup></b> |
|----------------------------------------------|-------------------------------------------------------------|---------------------------------------------------------------|-----------------------------|
| Age (years)                                  | 65.6 ± 7.4                                                  | 62.0 ± 6.9                                                    | < 0.001                     |
| Male sex, No. (%)                            | 789 (48.7)                                                  | 58 (42.0)                                                     | 0.13                        |
| BMI (kg/m <sup>2</sup> )                     | 24.23± 3.3                                                  | 24.1 ± 3.4                                                    | 0.66                        |
| Smoking status, No. (%)                      |                                                             |                                                               |                             |
| Current smoker                               | 305 (18.8)                                                  | 24 (17.4)                                                     |                             |
| Former smoker                                | 179 (11.0)                                                  | 11 (8.0)                                                      | 0.45                        |
| Never smoker                                 | 1137 (70.1)                                                 | 103 (74.6)                                                    |                             |
| Alcohol intake status, No. (%)               |                                                             |                                                               |                             |
| Current drinker                              | 360 (22.2)                                                  | 32 (23.2)                                                     |                             |
| Former drinker                               | 78 (4.8)                                                    | 7 (5.1)                                                       | 0.95                        |
| Never drinker                                | 1183 (73.0)                                                 | 99 (71.7)                                                     |                             |
| Education level, No. (%)                     |                                                             |                                                               |                             |
| Primary school or below                      | 512 (31.6)                                                  | 44 (31.9)                                                     |                             |
| Middle school                                | 563 (34.7)                                                  | 46 (33.3)                                                     | 0.94                        |
| High school or beyond                        | 546 (33.7)                                                  | 48 (34.8)                                                     |                             |
| Physical activity, No. (yes, %) <sup>b</sup> | 1466 (90.4)                                                 | 124 (89.9)                                                    | 0.82                        |
| CHD family history, No. (%)                  | 77 (4.8)                                                    | 11 (8.0)                                                      | 0.10                        |
| Hypertension, No. (%) <sup>c</sup>           | 699 (43.1)                                                  | 47 (34.1)                                                     | 0.039                       |
| Hyperlipidemia, No. (%) <sup>c</sup>         | 711 (43.9)                                                  | 57 (41.3)                                                     | 0.56                        |
| Diabetes, No. (%) <sup>c</sup>               | 171 (10.5)                                                  | 2 (1.4)                                                       | 0.002                       |
| eGFR (ml/min/1.73 m <sup>2</sup> )           | 88.00 ± 21.06                                               | 88.21 ± 20.98                                                 | 0.15                        |

Data are presented as mean ± SD, or number (percentage).

<sup>a</sup> p-Values are derived from Student's t tests for continuous variables, and Chi-square tests for the category variables.

<sup>b</sup> Physical activity was defined as exercise for more than twenty minutes per week for more than half a year.

<sup>c</sup> Hypertension, hyperlipidemia and diabetes were defined as shown in Table 1.

**Table S9. Variance and correlations between plasma metal concentrations measured in samples collected in 2003 and 2008 from participants in the Metals Variability Study (n = 138).**

| <b>Metal <sup>a</sup></b> | <b>Between person <math>\sigma^2</math></b> | <b>Within person <math>\sigma^2</math></b> | <b>ICC</b> | <b>r<sup>b</sup> (p-Value)</b> |
|---------------------------|---------------------------------------------|--------------------------------------------|------------|--------------------------------|
| Aluminum                  | 0.08                                        | 0.53                                       | 0.13       | -0.01 (0.91)                   |
| Antimony                  | 0.03                                        | 0.39                                       | 0.07       | 0.35 (< 0.001)                 |
| Arsenic                   | 0.09                                        | 0.29                                       | 0.25       | 0.003 (0.97)                   |
| Barium                    | 0.16                                        | 0.10                                       | 0.63       | 0.08 (0.37)                    |
| Cobalt                    | 0.04                                        | 0.12                                       | 0.25       | 0.43 (< 0.001)                 |
| Copper                    | 0.02                                        | 0.01                                       | 0.74       | 0.72 (< 0.001)                 |
| Lead                      | 0.18                                        | 0.22                                       | 0.45       | -0.01 (0.90)                   |
| Manganese                 | 0.04                                        | 0.08                                       | 0.36       | 0.08 (0.34)                    |
| Molybdenum                | 0.05                                        | 0.21                                       | 0.18       | 0.46 (< 0.001)                 |
| Nickel                    | 0.02                                        | 0.25                                       | 0.09       | 0.19 (0.02)                    |
| Rubidium                  | 0.02                                        | 0.01                                       | 0.65       | 0.51 (< 0.001)                 |
| Selenium                  | 0.03                                        | 0.02                                       | 0.64       | 0.73 (< 0.001)                 |
| Strontium                 | 0.04                                        | 0.02                                       | 0.61       | 0.52 (< 0.001)                 |
| Thallium                  | 0.08                                        | 0.21                                       | 0.26       | 0.55 (< 0.001)                 |
| Titanium                  | 0.01                                        | 0.01                                       | 0.56       | 0.52 (< 0.001)                 |
| Vanadium                  | 0.04                                        | 0.11                                       | 0.28       | 0.28 (0.001)                   |
| Zinc                      | 0.03                                        | 0.36                                       | 0.08       | -0.11 (0.19)                   |

Metals were log-transformed in the analysis.

Abbreviations: ICC, intra-class correlation coefficient.

<sup>a</sup> Plasma tungsten, tin, and uranium concentrations were excluded from further analysis because of many samples < LOD (98.3%, 80.2%, and 54.0%, respectively). Plasma cadmium, chromium, and iron were excluded from further analyses because of concerns about the use of plasma concentrations as a biomarker.

<sup>b</sup> Pearson correlation coefficients.

**Table S10. Basic characteristics of case-control study participants according to quartiles of plasma titanium (n = 3242).**

| Variables                            | Quartiles of Plasma Titanium |               |               |               | p-Value <sup>a</sup> |
|--------------------------------------|------------------------------|---------------|---------------|---------------|----------------------|
|                                      | Q1 (n = 724)                 | Q2 (n = 801)  | Q3 (n = 846)  | Q4 (n = 871)  |                      |
| Age (years)                          | 65.7 ± 7.0                   | 65.8 ± 7.7    | 65.6 ± 7.4    | 65.6 ± 7.3    | 0.84                 |
| Male sex, No. (%)                    | 404 (55.8)                   | 399 (49.8)    | 386 (45.6)    | 389 (44.7)    | < 0.001              |
| BMI (kg/m <sup>2</sup> )             | 24.70 ± 3.24                 | 24.33 ± 3.25  | 24.45 ± 3.32  | 24.61 ± 3.34  | 0.87                 |
| Smoking status, No. (%)              |                              |               |               |               |                      |
| Current smoker                       | 173 (23.9)                   | 152 (19.0)    | 164 (19.4)    | 160 (18.4)    |                      |
| Former smoker                        | 100 (13.8)                   | 93 (11.6)     | 88 (10.4)     | 101 (11.6)    | 0.01                 |
| Never smoker                         | 451 (62.3)                   | 556 (69.4)    | 594 (70.2)    | 610 (70.0)    |                      |
| Alcohol intake status, No. (%)       |                              |               |               |               |                      |
| Current drinker                      | 172 (23.8)                   | 189 (23.6)    | 170 (20.1)    | 190 (21.8)    |                      |
| Former drinker                       | 43 (5.9)                     | 33 (4.1)      | 36 (4.3)      | 36 (4.1)      | 0.18                 |
| Never drinker                        | 509 (70.3)                   | 579 (72.3)    | 640 (75.7)    | 645 (74.1)    |                      |
| Education level, No. (%)             |                              |               |               |               |                      |
| Primary school or below              | 233 (32.2)                   | 255 (31.8)    | 289 (34.2)    | 278 (31.9)    |                      |
| Middle school                        | 275 (38.0)                   | 299 (37.3)    | 273 (32.3)    | 313 (35.9)    | 0.29                 |
| High school or beyond                | 216 (29.8)                   | 247 (30.8)    | 284 (33.6)    | 280 (32.1)    |                      |
| Physical activity, No. (yes, %)      | 674 (89.4)                   | 719 (89.8)    | 754 (89.1)    | 783 (89.8)    | 0.95                 |
| CHD family history, No. (%)          | 31 (4.3)                     | 42 (5.2)      | 38 (4.5)      | 44 (5.1)      | 0.79                 |
| Hypertension, No. (%) <sup>b</sup>   | 378 (52.2)                   | 410 (51.2)    | 484 (57.2)    | 501 (57.5)    | 0.013                |
| Hyperlipidemia, No. (%) <sup>b</sup> | 295 (40.7)                   | 414 (51.7)    | 451 (53.3)    | 544 (62.5)    | < 0.001              |
| Diabetes, No. (%) <sup>b</sup>       | 122 (16.9)                   | 122 (15.2)    | 157 (18.6)    | 153 (17.6)    | 0.23                 |
| eGFR (ml/min/1.73 m <sup>2</sup> )   | 86.67 ± 20.43                | 87.19 ± 21.03 | 86.00 ± 20.31 | 85.88 ± 20.77 | 0.26                 |

Data are presented as mean ± SD, or number (percentage).

<sup>a</sup> p-Values of continuous variables were calculated with linear regression without adjustments, and category variables were calculated with Chi-square tests.

<sup>b</sup> Hypertension, hyperlipidemia and diabetes were defined as shown in Table 1.

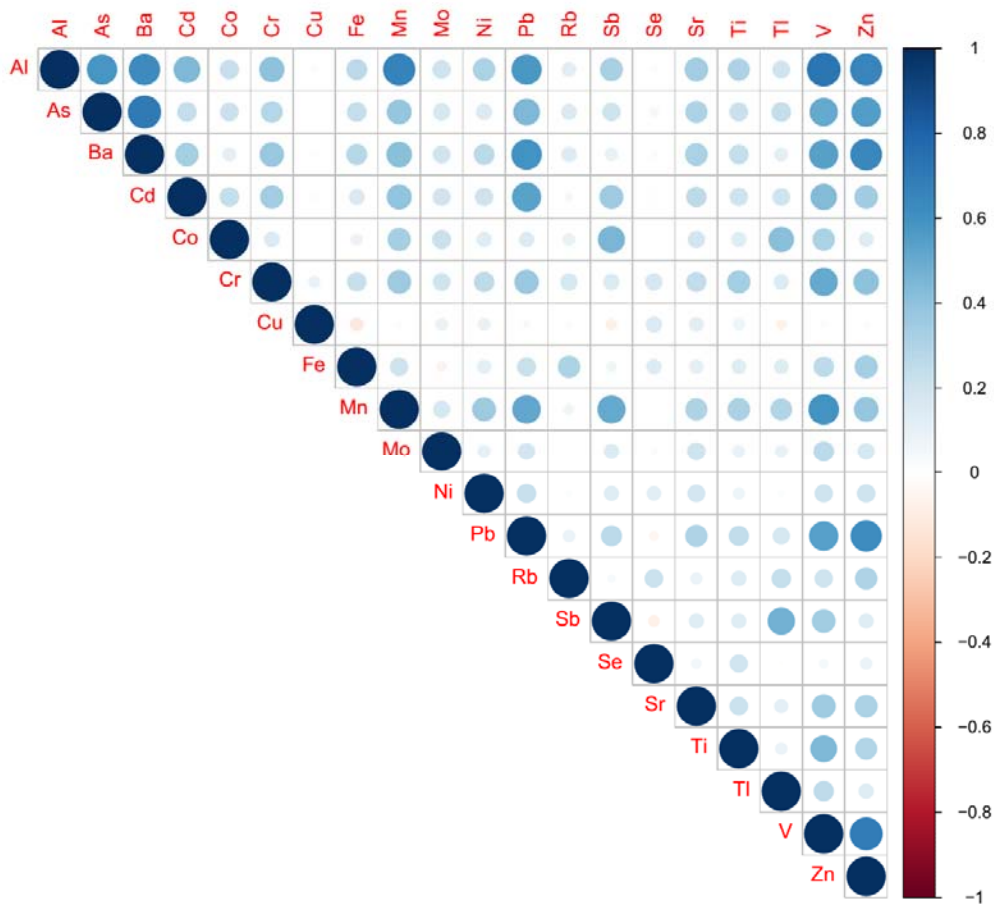

**Figure S1. Correlation matrix of plasma metals among the case-control study participants. Spearman's rank correlation coefficients are presented.**

Abbreviations: Al, Aluminum; As, Arsenic; Ba, Barium; Cd, Cadmium; Co, Cobalt; Cr, Chromium; Cu, Copper; Fe, Iron; Mn, Manganese; Mo, Molybdenum; Ni, Nickel; Pb, Lead; Rb, Rubidium; Sb, Antimony; Se, Selenium; Sr, Strontium; Tl, Titanium; Tl, Thallium; V, Vanadium; Zn, Zinc.



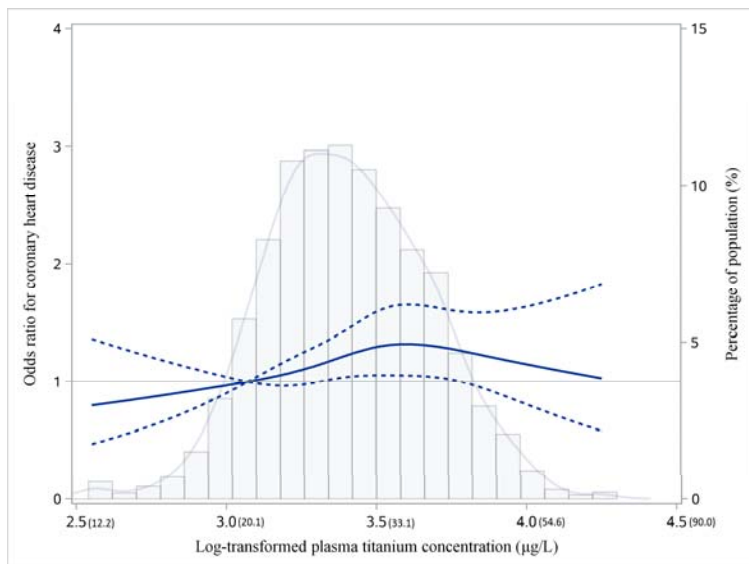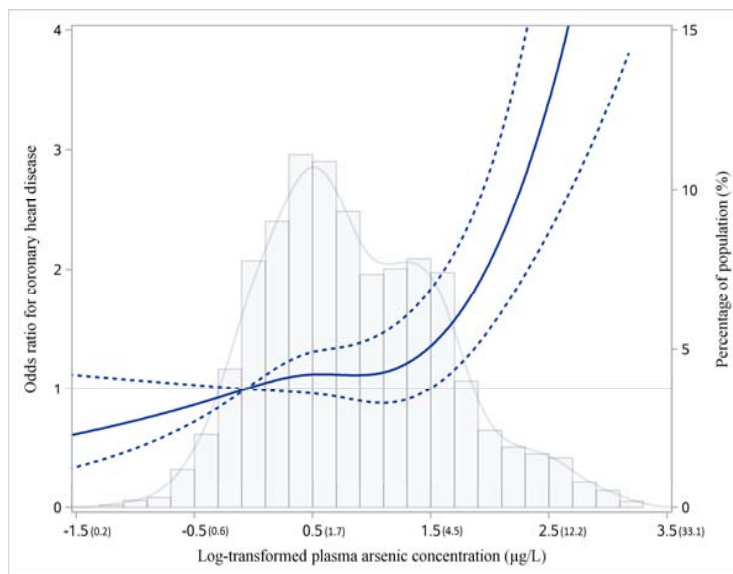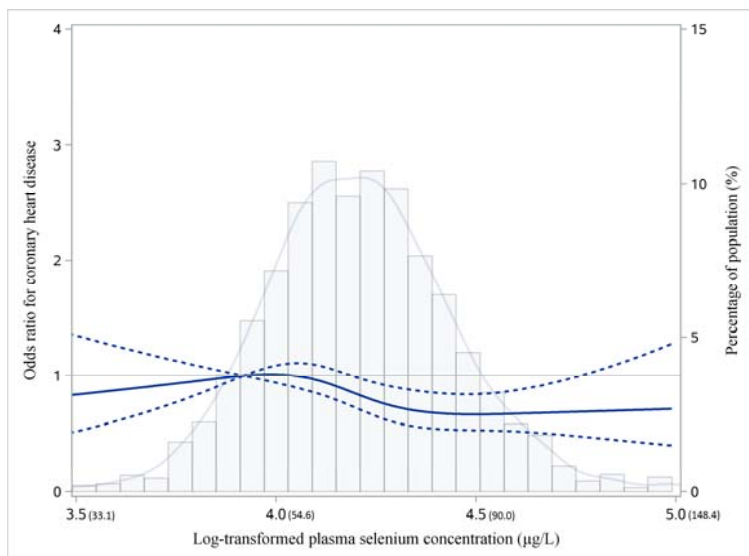

**Figure S2. The restricted cubic spline for the association between plasma metals and incident CHD.**

The lines represent adjusted odds ratios based on restricted cubic splines for the log-transformed levels of plasma titanium, arsenic, and selenium in the multiple-metals conditional regression model.

Knots were placed at 5<sup>th</sup>, 35<sup>th</sup>, 65<sup>th</sup>, and 95<sup>th</sup> percentiles. Adjustment factors were the same as multiple-metal model. The bars represent histograms of plasma metal distribution among the total population.

The model included barium and aluminum as well.
